# Supplementary material for: The Emerging Workforce of International University Student Workers: Injury Experience in an Australian University
Source: MDPI journal article supplement (doi:10.3390/ijerph15030456), 2018-03-06

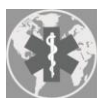

# Online survey questionnaire

*Project title:*

**International Students as Young Migrant Workers in South Australia: The Role of the University  
in OHS Awareness and Education**

## **A. DEMOGRAPHIC DATA**

1. **Age :** \_\_\_\_\_ Years

2. **Gender :** Female ☐ Male ☐

3. **Study Program :** Undergraduate ☐ Master- ☐  
Coursework ☐  
Master - Research ☐ PhD ☐  
Other (*please specify*) \_\_\_\_\_

4. **Year of study :** 1<sup>st</sup> ☐ 2<sup>nd</sup> ☐ 3<sup>rd</sup> ☐ 4<sup>th</sup> ☐  
Other (*please specify*) \_\_\_\_\_

5. **Financial Support :** Private ☐ Partial Scholarship ☐ Full Scholarship ☐

6. **Which country are you from?** \_\_\_\_\_

7. **In which faculty in the university do you study?**

Humanities and Social Sciences ☐ The Professions ☐ Sciences ☐

Engineering, Computer and Mathematics ☐ Health Sciences ☐

8. **Does your course involve a work placement or internship?** Yes ☐ No ☐

9. **Does your course involve:** Laboratory ☐ Field Trip ☐ Machinery ☐  
(*you can tick more than one*) work ☐ workshop ☐

Other workshop or practical tasks  
(*please specify*) \_\_\_\_\_

## **B. STUDENT WORKING EXPERIENCE**

(Only complete this section if you are currently working, or have been working while studying at a University in Australia)

10. What is your job status? Casual ☐ Part-time ☐ Seasonal ☐ Other \_\_\_\_\_

11. How many jobs do you have? One ☐ More than one ☐  
(if more than one please fill the data for the primary job)

12. What is the sector of industry? Cleaning ☐ Supermarket/Grocery/Shop ☐  
Agriculture ☐ Restaurant ☐ Other \_\_\_\_\_

13. Are exposed to any hazards at work? Chemical ☐ Biological ☐ Repetitive movement ☐  
Physical ☐ Psychosocial ☐ Other \_\_\_\_\_  
(you can tick more than one)

14. The main reason for working: (you can tick more than one)  
To pay tuition fee ☐ To supplement living allowance ☐  
To pay living cost ☐ To support family in home country ☐  
To get extra money ☐ To improve my language ☐  
To understand Australian culture ☐ Peer recognition ☐  
Other \_\_\_\_\_

15. Do you think your wages are fair? Yes ☐ No ☐

16. On average, how many hours do you work per week? \_\_\_\_\_

17. How long have you been working there? \_\_\_\_\_

18. Working conditions: Mainly outdoor ☐ Mainly indoor ☐

19. Do you work under supervision? Yes ☐ No ☐

## C. TRAINING EXPERIENCE

20. Have you ever had any training in occupational health and safety? Yes ☐ No ☐

21. If YES, did it occur at: University ☐ TAFE ☐ High School ☐

As part of paid or voluntary employment outside of school? ☐

22. What was the length of training? \_\_\_\_\_ hours

23. Was it: Single brief session ☐ Formal course ☐

Ongoing/repeated training ☐

24. Format : Paper-based ☐ Computer-based ☐

Video-based ☐ Face-to-face presentation ☐

25. Were you assessed on the training? Yes ☐ No ☐

26. Do you think the training was Too much ☐ About right ☐ Too little ☐

## D. INJURY EXPERIENCE

27. Have you ever had an injury at work? Yes ☐ No ☐

*If NO, please go to the question No. 34*

28. If YES, did you receive OHS training before or after the injury? Before ☐ After ☐

29. How many times have you experienced injury at work?

Once ☐ Twice ☐ Three times ☐ More than three times ☐

30. What sort of injury that you ever had? (please mention the primary one)

\_\_\_\_\_

31. What did you do to treat the injury?

Went to hospital emergency ☐ Visited GP ☐

Did not do anything ☐ Other \_\_\_\_\_

32. If you had treatment in GP/hospital, how did you pay for the treatment?

Out of pocket payment ☐ Covered by OSHC ☐

Work Cover Compensation ☐ Other \_\_\_\_\_

33. Did you report the injury to your supervisor or company? Yes ☐ No ☐

34. Have you ever witnessed a workplace accident? Yes ☐ No ☐

*If NO, please go to the question No. 37*

35. Did the accident result in a serious injury? Yes ☐ No ☐

36. Have you ever experienced any of following conditions in the workplace?

Discrimination Yes ☐ No ☐

Intimidation Yes ☐ No ☐

Exploitation Yes ☐ No ☐

Other (please specify) \_\_\_\_\_

#### E. ACADEMIC INTERFERENCES

37. Do you feel that your work interferes with your study?

Never ☐ Sometimes ☐ Often ☐

*If Never, please go to the question No. 40.*

38. If SOMETIMES/OFTEN, how did it interfere?

Tiredness ☐ Time table clash ☐

☐ Not focused on study ☐

39. Have you ever experienced any of following conditions?

Failure to submit assignment/task on time Yes ☐ No ☐

Stress Yes ☐ No ☐

#### F. STUDENT'S OHS PERCEPTIONS AND CONFIDENCE

40. Do you think you have the skills and confidence to discuss health and safety issues with your

lecturer, or other relevant person?

Yes ☐ No ☐

41. Do you feel strongly about any OHS issue? Yes ☐ No ☐

42. If YES, what issue? Personal security ☐ Bullying ☐  
Workplace safety ☐ Other \_\_\_\_\_ (Please specify)

## G. ROLE OF UNIVERSITY IN RAISING OHS AWARENESS AND EDUCATION

43. Do you think the university has a responsibility to provide OHS education?

Yes ☐ No ☐

44. Where should OHS information be included?

Existing induction program for international students eg, EAP, IBP etc ☐

Separate workshop/additional OHS workshop ☐

As a part of normal curriculum at school ☐

Other \_\_\_\_\_

45. Do you think that health and safety has been included in your university study?

Yes ☐ No ☐

*If NO, please go to the question No. 48*

46. If YES, what kind of health and safety information provided?

Rights and responsibilities ☐ Hazards ☐

Specific control measure ☐ Other \_\_\_\_\_

47. Do you think it is directly relevant to your current job?

Yes ☐ No ☐

48. Do you think university needs to do more?

Yes ☐ No ☐

49. Have you done the university OHS online induction course?

Yes ☐ No ☐

82

83

© 2018 by the authors. Submitted for possible open access publication under the terms and conditions of the Creative Commons Attribution (CC BY) license (<http://creativecommons.org/licenses/by/4.0/>).

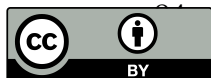

Supplement: s1 [file s1]
